1 **Infant Transmitted/Founder HIV-1 Viruses from Peripartum Transmission**  
2 **are Neutralization Resistant to Paired Maternal Plasma**

3 Amit Kumar<sup>1</sup>, Claire E. P. Smith<sup>1</sup>, Elena E. Giorgi<sup>2</sup>, Joshua Eudailey<sup>1</sup>, David R. Martinez<sup>1</sup>,  
4 Karina Yusim<sup>2</sup>, Ayooluwa O. Douglas<sup>1</sup>, Lisa Stamper<sup>1</sup>, Erin McGuire<sup>1</sup>, Celia C. LaBranche<sup>3</sup>,  
5 David C. Montefiori<sup>3</sup>, Genevieve G. Fouda<sup>1</sup>, Feng Gao<sup>4,u</sup> and Sallie R. Permar<sup>1,u,\*</sup>.

6 <sup>1</sup>Duke Human Vaccine Institute, Duke University Medical Centre, Durham, North Carolina,  
7 United States of America

8 <sup>2</sup>Los Alamos National Laboratory, Los Alamos, New Mexico, United States of America

9 <sup>3</sup>Department of Surgery, Duke University Medical Centre, Durham, North Carolina, United  
10 States of America

11 <sup>4</sup>Department of Medicine, Duke University Medical Centre, Durham, North Carolina, United  
12 States of America

13

14

15

16

17 <sup>u</sup>These authors contributed equally.

18 \*Corresponding author: Sallie R. Permar

19 Email: [sallie.permar@duke.edu](mailto:sallie.permar@duke.edu) (SRP)

20 **Abstract**

21 Despite extensive genetic diversity of HIV-1 in chronic infection, infant HIV-1 infection  
22 involves selective transmission of a single or few maternal virus variants. These  
23 transmitted/founder (T/F) variants are of particular interest, as a maternal or infant HIV vaccine  
24 should raise envelope (Env)-specific IgG responses capable of blocking this group of viruses.  
25 However, the maternal or infant factors that contribute to selection of infant T/F viruses are not  
26 well understood. In this study, we isolated HIV-1 *env* genes by single genome amplification from  
27 16 mother-infant transmitting pairs from the U.S. pre-antiretroviral era Women Infant  
28 Transmission Study (WITS). Infant T/F and representative maternal non-transmitted Env  
29 variants from plasma were identified and used to generate pseudoviruses for paired maternal  
30 plasma neutralization sensitivity analysis. Eighteen out of 21 (85%) infant T/F Env  
31 pseudoviruses were neutralization resistant to paired maternal plasma. Yet, all infant T/F viruses  
32 were neutralization sensitive to a panel of HIV-1 broadly neutralizing antibodies and variably  
33 sensitive to heterologous plasma neutralizing antibodies. Moreover, infant T/F pseudoviruses  
34 were overall more neutralization resistant compared to maternal non-transmitted plasma variants  
35 ( $p=0.012$ ). Altogether, our findings suggest that autologous neutralization of circulating viruses  
36 by maternal plasma antibodies select for neutralization-resistant viruses that initiate peripartum  
37 transmission, raising the specter that enhancement of this response at the end of pregnancy could  
38 further reduce infant HIV infection risk.

## 39 **Author Summary**

40 Mother to child transmission (MTCT) of HIV-1 can occur during pregnancy (*in utero*), at the  
41 time of delivery (peripartum) or by breastfeeding (postpartum). With the availability of anti-  
42 retroviral therapy (ART), rate of MTCT of HIV-1 have been significantly lowered. However,  
43 significant implementation challenges remains in resource-poor areas, making it difficult to  
44 eliminate pediatric HIV. An improved understanding of the viral population (escape variants  
45 from autologous neutralizing antibodies) that lead to infection of infants at time of transmission  
46 will help in designing immune interventions to reduce vertical HIV-1 transmission. Here, we  
47 selected 16 HIV-1-infected mother-infant pairs from WITS cohort (from pre anti-retroviral era),  
48 where infants became infected peripartum. HIV-1 *env* gene sequences were obtained by the  
49 single genome amplification method. The sensitivity of these infant Env pseudoviruses against  
50 paired maternal plasma and a panel of broadly neutralizing monoclonal antibodies (bNAbs) was  
51 analyzed. We demonstrated that the infant T/F viruses were more resistant against maternal  
52 plasma than non-transmitted maternal variants, but sensitive to most (bNAbs). Signature  
53 sequence analysis of infant T/F and non-transmitted maternal variants revealed the potential  
54 importance of V3 and MPER region for resistance against to paired maternal plasma. These  
55 findings provide insights for the design of maternal immunization strategies to enhance  
56 neutralizing antibodies that target V3 region of autologous virus populations, which could work  
57 synergistically with maternal ARVs to further reduce the rate of peripartum HIV-1 transmission.

## 58 **Introduction**

59 Despite the wide success of antiretroviral therapy (ART) in lowering mother-to-child  
60 transmission (MTCT) risk of HIV-1 below 2%, each year more than 150,000 children become  
61 infected worldwide [1]. Even if 90% maternal ART coverage is reached, approximately 138,000  
62 infant HIV-1 infections will still occur annually [2, 3] due to factors that include: drug non-  
63 adherence, breakthrough infections, development of drug resistant viral strains, late presentation  
64 of pregnant women to clinical care, and acute infection during late pregnancy or breastfeeding.  
65 Vertical transmission of HIV can occur through three distinct modes: antepartum (*in utero*),  
66 peripartum (around the time of delivery), or postpartum (via breastfeeding). Interestingly, only  
67 30-40% of infants born to HIV infected mothers acquire HIV-1 in the absence of ART[4]. Thus,  
68 maternal factors, such as maternal Env-specific antibodies, may contribute to protecting infants  
69 from HIV infection. Maternal factors that are associated with HIV transmission risk include: low  
70 maternal peripheral CD4+ T cell count, and high maternal plasma viral load, delivery mode, and  
71 infant gestational age [5-7]. Yet, the role of maternal Env-specific antibody responses and their  
72 association with reduced MTCT risk still remains unclear. Previous studies have reported an  
73 association between the magnitude of maternal antibody responses and reduced risk of MTCT  
74 [8-10]. However, this association has not been universally observed [11-15]. Moreover, it has  
75 been observed that variants transmitted to infants can be resistant to neutralization by maternal  
76 plasma [16], although other studies have failed to replicate these observations [17-19]. These  
77 conflicting results may be due to the small number of subjects included in these studies and study  
78 designs that inconsistently control for viral and host factors known to impact transmission risk,  
79 such as maternal peripheral CD4+ T cell counts, plasma viral load, non-identification of T/F  
80 viruses, and ART use. Moreover, isolation of autologous viruses from a large cohort of HIV-

81 infected, transmitting mothers for assessment of the impact of maternal plasma neutralization  
82 activity against her own viruses has not to our knowledge, been investigated. Thus, despite  
83 considerable effort, it remains unclear whether maternal antibody responses impact the risk of  
84 vertical transmission of HIV.

85 We recently completed a maternal humoral immune correlates of protection analysis to  
86 identify maternal humoral immune responses associated with protection against peripartum HIV  
87 infection using samples from the US-based Women and Infants Transmission (WITS) study [20].  
88 The WITS cohort was enrolled prior to the availability of ART prophylaxis as the clinical  
89 standard of care in HIV-infected pregnant mothers and their infants, thereby eliminating the  
90 strong impact of ART on vertical HIV transmission risk and outcome [21, 22]. Additionally, we  
91 controlled for established maternal and infant risk factors associated with vertical transmission,  
92 including maternal peripheral CD4+ T cell count, maternal plasma HIV-1 viral load, infant  
93 gestational age, and delivery mode by propensity score matching of transmitting and non-  
94 transmitting women. The results of this immune correlate analysis indicated an association  
95 between high levels of maternal antibodies against the HIV-1 Env glycoprotein third variable  
96 loop (V3) and reduced MTCT risk [20]. In addition, and more surprisingly, the ability of  
97 maternal plasma to neutralize tier 1 viruses (easy-to-neutralize), but not tier 2 (difficult to  
98 neutralize) viruses, also predicted decreased risk of vertical transmission of HIV-1. Yet,  
99 vertically transmitted HIV variants have been characterized as more difficult to neutralize tier 2-  
100 like variants [17, 23-26]. Thus, it was surprising that tier 1 virus neutralizing antibodies were  
101 associated with decreased transmission risk. More interestingly, maternal V3-specific  
102 monoclonal IgG antibodies isolated from a non-transmitting mother neutralized a large  
103 proportion of maternal autologous viruses isolated from her plasma[20], leading to the

104 conclusion that maternal V3-specific non-broadly neutralizing antibodies, which were previously  
105 thought to be ineffective at preventing HIV-1 transmission, might indeed play a role in  
106 preventing MTCT. In fact, Moody et.al [27] showed that V3 and CD4 binding site (CD4bs)  
107 specific monoclonal antibodies isolated from non-pregnant chronically HIV-infected individuals  
108 could also neutralize a large proportion of autologous circulating viruses isolated from plasma.  
109 These V3 and CD4bs-specific autologous virus-neutralizing mAbs exhibited tier 1 neutralization  
110 activity but limited heterologous tier 2 virus neutralization, suggesting that measurement of tier 2  
111 heterologous virus neutralization potency of mAbs or plasma does not predict autologous virus  
112 neutralization capacity.

113 In contrast to the extensive genetic diversity of HIV-1 variants in a chronically infected host,  
114 acute HIV infection in both heterosexual and vertical routes are characterized by a homogeneous  
115 viral population [17, 18, 28-31]. This viral genetic bottleneck suggests the selective transmission  
116 of a single or homogeneous group of viruses [4]. In the setting of MTCT, maternal or infant  
117 immunologic and virologic factors that drive the selective transmission of one or a few HIV  
118 variants are not established [32]. As maternal viruses co-circulate with maternal HIV Env-  
119 specific antibodies, it is possible that maternal antibodies play a role in selecting maternal escape  
120 viruses that may initiate infection in the infant. Therefore, studying unique features of infant T/F  
121 viruses and their neutralization-sensitivity determinants to maternal autologous virus neutralizing  
122 antibodies may provide insights of the molecular events that lead to virus escape from maternal  
123 humoral responses.

124 The use of broadly neutralizing antibodies as a treatment and/or prevention strategy is  
125 currently being explored in adult and infant clinical trials [33, 34]. Among the new generation of  
126 bNAbs, VRC01 (antibody recognizing CD4bs region) has been able to neutralize about 80% of

127 diverse HIV-1 strains [35, 36]. This has lead to studies of VRC01 impact on HIV-1 infection in  
128 adults and infants when infused passively, with a phase I study of pharmacokinetics and safety of  
129 VRC01 in HIV-exposed newborns currently underway [37]. However, the susceptibility of infant  
130 T/F viruses to bNAbs like VRC01 does not seem to define infant T/F viruses from maternal non-  
131 transmitted viruses [17] and administration of a bNAb to chronically-infected mothers is likely to  
132 lead to rapid development of resistant viruses [34, 38]. Thus, defining the role of autologous  
133 neutralization in MTCT is critical to establishing the utility of active maternal vaccination to  
134 further reduce and eliminate infant HIV infections.

135 In this study, we characterized maternal non-transmitting and infant T/F viruses from 16  
136 HIV-1 clade B infected peripartum transmission mother-infant pairs from the WITS cohort and  
137 defined the role of concurrent maternal autologous virus neutralizing antibodies in selecting for  
138 infant T/F viruses. We sought to define if neutralization resistance to paired maternal plasma was  
139 a defining feature of infant T/F viruses compared to other circulating non-transmitted maternal  
140 variants, which will inform the development of maternal or infant vaccination strategies to  
141 further reduced MTCT risk to achieve an HIV-free generation.

## 142 **Results**

### 143 **Maternal and infant sample characteristics**

144 We selected sixteen, HIV-1 infected mother-infant transmission pairs from the WITS cohort that  
145 met the inclusion criteria of peripartum transmission (infants tested negative for HIV-1 infection  
146 at birth by HIV-1 DNA PCR, yet had HIV-1 DNA detectable at one week of age or older; see  
147 Table1). These HIV-exposed infants had not reportedly been breastfed [22]. Infant plasma  
148 samples available for sequencing were between 16 - 74 days of age. Five HIV-infected infants  
149 with heterogeneous virus populations were excluded from the study due to our inability to  
150 confidently infer the infant T/F virus. The maternal plasma viral load of the selected transmitting  
151 women ranged from 4,104 to 3,68,471 copies/mL, and peripheral blood CD4<sup>+</sup> T-cell counts  
152 ranged from 107 to 760 cell/mm<sup>3</sup>. Infant plasma viral loads varied between 11,110 and 2,042,124  
153 copies/mL, and CD4<sup>+</sup> T-cell counts were between 1,872 and 7,628 cell/mm<sup>3</sup>. All infants were  
154 born via vaginal delivery except for three infants (100014, 100155, 100307) born via cesarean  
155 section, thus potentially representing late *in utero* transmission. Four infants (100014, 100155,  
156 100307, 102149) were born prematurely (31, 34, and 36 weeks respectively), and the remaining  
157 infants were born between 37 and 40 weeks of gestation.



158 **Table 1. Maternal and infant pair clinical characteristics around delivery.**

| Maternal and Infant ID | Year | Maternal Visit of sample collection | Mode of Transmission | Maternal plasma Viral Load (copies/mL) | Maternal Peripheral CD4+ T-cell count (cells/mm <sup>3</sup> ) | Mode of Delivery | Weeks Gestation | Infant Age at sample Collection (days) | Infant Viral Load (copies/mL) | Infant Peripheral CD4+ T-cell count (cells/mm <sup>3</sup> ) |
|------------------------|------|-------------------------------------|----------------------|----------------------------------------|----------------------------------------------------------------|------------------|-----------------|----------------------------------------|-------------------------------|--------------------------------------------------------------|
| 100002                 | 1993 | Delivery                            | Peripartum           | 305,213                                | 221                                                            | Vaginal          | 38              | 16                                     | 1,230,000                     | 3326                                                         |
| 100014                 | 1993 | Delivery                            | Peripartum           | 21,918                                 | 692*                                                           | C-section        | 31              | 66                                     | 120,000                       | 2012                                                         |
| 100046                 | 1993 | Delivery                            | Peripartum           | 12,635                                 | 707                                                            | Vaginal          | 40              | 63                                     | 1,025,458                     | 2509                                                         |
| 100052                 | 1993 | Delivery                            | Peripartum           | 23,750                                 | 450                                                            | Vaginal          | 40              | 34                                     | 333,142                       | 3219                                                         |
| 100155                 | 1992 | Delivery                            | Unknown              | 87,193                                 | 318                                                            | C-Section        | 36              | 60                                     | NA                            | 3609                                                         |
| 100307                 | 1991 | Delivery                            | Unknown              | 139,053                                | 467*                                                           | C-section        | 36              | 32                                     | 905,079                       | 2308                                                         |
| 100383                 | 1991 | Delivery                            | Peripartum           | 358,602                                | 244                                                            | Vaginal          | 37              | 74                                     | 338,000                       | 2071 <sup>‡</sup>                                            |
| 100504                 | 1993 | NA                                  | Unknown              | 68287                                  | 1049                                                           | C-Section        | 39              | 30                                     | NA                            | 2742                                                         |
| 100711                 | 1990 | Delivery                            | Unknown              | 4,104*                                 | 571*                                                           | Vaginal          | 39              | 64                                     | 341,691                       | 1872 <sup>‡</sup>                                            |
| 100890                 | 1991 | Delivery                            | Peripartum           | 368,471                                | 409                                                            | Vaginal          | 39              | 26                                     | 192,000 <sup>‡</sup>          | 2598                                                         |
| 100997                 | 1991 | Delivery                            | Peripartum           | 175,526                                | 413                                                            | Vaginal          | 38              | 20                                     | 46,289 <sup>‡</sup>           | 7048                                                         |
| 101421                 | 1991 | Delivery                            | Peripartum           | 17,370                                 | 760                                                            | Vaginal          | 37              | 29                                     | 48,783                        | 7628                                                         |
| 101984                 | 1991 | Delivery                            | Peripartum           | 94,087                                 | 107                                                            | Vaginal          | 36              | 30                                     | 317969                        | 1980                                                         |
| 102149                 | 1993 | Delivery                            | Unknown              | 253,906                                | 373                                                            | Vaginal          | 34              | 33                                     | 2,042,124                     | 3181                                                         |
| 102407                 | 1993 | Delivery                            | Peripartum           | 104,922                                | 422                                                            | Vaginal          | 40              | 35                                     | 11,100                        | 4677                                                         |
| 102605                 | 1992 | NA                                  | Unknown              | 5684                                   | 337                                                            | Vaginal          | 39              | 60                                     | 156639                        | 1360                                                         |

159 <sup>\*</sup> Peripheral CD4+ T cell count and/or viral load reported from next available visit, within 2 months

160 from the sample that was obtained for sequencing. NA =Not Available.

161 <sup>‡</sup>Peripheral CD4+ T cell count and/or viral load reported from 25 weeks gestation, as CD4+ T cell

162 count and/or viral load was not available at time of delivery.

163 **Characterization of the complete *env* gene sequences from paired mother-infant plasma**

164 A total of 463 *env* genes were obtained from 16 maternal plasma samples (collected at time of  
165 delivery) from transmitting mothers as previously described [24]. Paired infant plasma samples were  
166 used to obtain 465 *env* gene sequences (Table 2). Neighbor-joining phylogenetic trees and  
167 highlighter plots of the *env* sequences from each infant were used to define infant T/F viruses. These  
168 analyses showed within-lineage low diversity populations in infant Env isolates and chronic-like  
169 diversity in maternal *env* sequences (Fig.1, A-C and Fig. S1 A-B). In 6 out of 16 (37%) infants we  
170 detected 2 or 3 (in case of 100002) genetically distinct T/F variants, one of which was present at  
171 higher frequency (primary T/F), while the second one was present at lower frequency (secondary  
172 T/F). In the other 10 infants demonstrated we observed only one T/F virus (67%). With the  
173 exception of two infants, all of our samples had over 20 infant sequences, giving us a 90%  
174 confidence that we were able to sample all variants with a population frequency of at least 10%. For  
175 the two infant samples for which we only had 15 and 18 sequences respectively, we were 90%  
176 confident that we were able to sample all variants with a population frequency of 15% or more [24].  
177 Using an algorithm described in the Methods, out of these 463 maternal *env* variants, we selected  
178 134 SGA variants for *env* pseudovirus production (5-12 per mother) to represent the *env* genetic  
179 diversity found in the plasma of each transmitting mother at the time of delivery.

180 **Table 2. Number of sequences, T/F viruses, and estimated days since most common recent**  
 181 **ancestor (MRCA) in infants.**

| Maternal and Infant pair ID | Number of Infant envelope gene SGAs | Estimated Number of infant T/F viruses* | Infant age at sample collection (days) | Estimated days Since Most Recent Common Ancestor (95% CI) <sup>‡</sup> | Notes                                           |
|-----------------------------|-------------------------------------|-----------------------------------------|----------------------------------------|------------------------------------------------------------------------|-------------------------------------------------|
| 100002                      | 43                                  | 3                                       | 16                                     | 21 (14,28)                                                             | Fits a Poisson after removing recombinants.     |
| 100014                      | 26                                  | 1                                       | 66                                     | 35 (28,42)                                                             | Fits a Poisson.                                 |
| 100046                      | 33                                  | 1                                       | 63                                     | 77 (65,89)                                                             | Fits a Poisson after removing hypermutation.    |
| 100052                      | 27                                  | 1                                       | 34                                     | 58 (41,75)                                                             | Fits a Poisson after removing hypermutation.    |
| 100155                      | 23                                  | 1                                       | 60                                     | 63 (50,76)                                                             | Fits a Poisson.                                 |
| 100307                      | 31                                  | 2                                       | 32                                     | 27 (18,36)                                                             | Fits a Poisson after removing recombinants.     |
| 100383                      | 24                                  | 1                                       | 74                                     | 80 (67,92)                                                             | Fits a Poisson.                                 |
| 100504                      | 44                                  | 1                                       | 30                                     | 13 (8,18)                                                              | Fits a Poisson after removing hypermutation.    |
| 100711                      | 26                                  | 1                                       | 64                                     | 27 (17,37)                                                             | Fits a Poisson after removing hypermutation.    |
| 100890                      | 18                                  | 2                                       | 26                                     | 35 (17,54)                                                             | Fits a Poisson after removing recombinants.     |
| 100997                      | 32                                  | 2                                       | 20                                     | 19 (13,25)                                                             | Fits a Poisson after removing recombinants.     |
| 101421                      | 22                                  | 2                                       | 29                                     | 20 (11,29)                                                             | Fits a Poisson.                                 |
| 101984                      | 34                                  | 2                                       | 30                                     | 14 (10,19)                                                             | Fits a Poisson after removing hypermutation.    |
| 102149                      | 27                                  | 1                                       | 33                                     | 43 (31,55)                                                             | Fits a Poisson after removing hypermutation.    |
| 102407                      | 15                                  | 1                                       | 35                                     | 15 (9,22)                                                              | Fits a Poisson.                                 |
| 102605                      | 40                                  | 1                                       | 60                                     | NA                                                                     | Does not fit a Poisson, evidence for selection. |

182 \*Number of T/Fs were estimated through visual analysis of highlighter plots and phylogenetic  
 183 trees after eliminating recombinants and hypermutated sequences.

184 <sup>‡</sup>Days since most recent common ancestor (MRCA) were calculated using the LANL tool  
 185 Poisson Fitter [https://www.hiv.lanl.gov/content/sequence/POISSON\\_FITTER/pfitter.html](https://www.hiv.lanl.gov/content/sequence/POISSON_FITTER/pfitter.html)

## 186 **Confirming the timing of infant HIV-1 infection**

187 As the infants were selected for peripartum transmission, their age at sampling (in days) was also  
188 the post-infection time. To confirm the time of infection, all infant alignments were analyzed  
189 using the LANL Poisson Fitter tool [39]. For infants that had more than one T/F, only the  
190 sequences in the major T/F lineage were used for this analysis. When recombinants and  
191 APOBEC enrichment were detected, the timing was calculated after removing recombinants  
192 and/or positions enriched for hypermutation [24, 39].

193 All but one infant (102605) yielded a good Poisson fit, indicating that the amount of diversity  
194 found in these samples was compatible with a random accumulation of mutations as observed in  
195 acute infections. Four infants had detected recombinants and 6 infants yielded a good Poisson fit  
196 after removing positions enriched for hypermutation (Table 2). The time since the most common  
197 ancestor was consistent with transmission at delivery in 9 out of 16 pairs (57%), within the 95%  
198 confidence interval of the Poisson Fitter time estimate (Table 2). For three infants, Poisson Fitter  
199 estimated the time since infection to be younger than the reported infant age, and for one the  
200 infection showed more diversity than expected by the reported infant age. Discrepancies between  
201 actual vs. predicted transmission timing could be due to a number of factors, including late *in*  
202 *utero* infection, postpartum infection from unreported breastfeeding, and the model being  
203 designed to evaluate an adult rather than infant HIV-1 evolution, which could gather mutations  
204 more rapidly due to more robust T cell responses.

205 Infant 102605 *env* SGAs did not yield a good Poisson fit due to non-random accumulation of  
206 non-synonymous mutations (which breaks the model assumption of random accumulation of  
207 mutations) at HXB2 positions 752-754 (Fig. S2). We looked at this region in the LANL  
208 immunology database (<https://www.hiv.lanl.gov/content/immunology/index>), and found five

209 different human CTL epitopes that have been documented in the literature, confirming that the  
210 non-random mutations found in infant 102605 were likely due to selection pressure by T cell  
211 responses.

### 212 **Neutralization sensitivity and tier classification of the infant T/F viruses**

213 Twenty-one infant T/F *env* amplicons including 16 primary T/Fs and 5 secondary T/Fs were used  
214 to generate pseudoviruses and their neutralization sensitivity to paired maternal plasma and a  
215 panel of bNAbs was assessed. None of the mothers with the exception of two (100014 and  
216 100504) had non-specific neutralization activity as assessed by neutralization activity against a  
217 murine leukemia virus (MLV). Eighteen out of 21 infant T/F Env pseudoviruses (86%) were  
218 resistant to paired maternal serum ( $ID_{50} < 40$ ). Sensitivity of 2 Infant T/F pseudoviruses' (100014  
219 and 100504) against paired maternal plasma could not be determined with confidence due to  
220 higher plasma reactivity against MLV. T/F virus of infant 100046 was sensitive against paired  
221 maternal plasma (Fig. 2).

222         When Infant T/F pseudoviruses were tested against the autologous plasma, only 2 infants  
223 T/F (100046 and 100155) showed some sensitivity as per our criteria ( $ID_{50} > 3X$  that of MLV)  
224 while others were completely resistant. Some infant T/F pseudoviruses did show sensitivity  
225 against their own plasma but were not considered as sensitive due to high reactivity against  
226 MLV.

227         To determine whether these infant T/F *env* variants were globally resistant to heterologous  
228 plasma neutralization, we performed neutralization tier phenotyping using a standardized panel  
229 of heterologous plasma of HIV-1 infected individuals [40]. Thirteen (62%) of 21 infant T/F Env  
230 pseudoviruses tested were classified as tier 2 neutralization phenotype while 3 (14%) of 21 were

231 classified as tier 3 neutralization phenotype, as expected for infant T/F viruses (Fig. 2).  
232 Remarkably, the remaining 5 (24%) tested were classified as the easier-to-neutralize tier 1b or  
233 tier 1a sensitivity, possibly because that these variants were uniquely resistant to their paired  
234 maternal plasma (Fig. 2).

235 In contrast to the relative resistance to paired maternal plasma neutralization, all the infant  
236 T/F viruses were relatively sensitive to second-generation HIV-1 broadly neutralizing antibodies,  
237 such as VRC-01, (IC<sub>50</sub> range 0.12-5.0 µg/ml), PGT121 (IC<sub>50</sub> range 0.01-0.13 µg/ml), NIH 45-46  
238 (IC<sub>50</sub> range 0.01-0.28 µg/ml) and first generation bNAb 10E8 (IC<sub>50</sub> range 0.05-0.76 µg/ml) (Fig.  
239 3 and Fig. S3). Not surprisingly, the infant T/F Env pseudoviruses were less neutralization  
240 sensitive to the less potent first generation broadly neutralizing antibodies b12 (IC<sub>50</sub> range 2.97-  
241 25 µg/ml), 4E10 (IC<sub>50</sub> range 1.31-18.73 µg/ml) and 2F5 (IC<sub>50</sub> range 1.01-19.09 µg/ml) (Fig. 3).  
242 Importantly, all the infant T/F viruses were neutralization sensitive to VRC-01, a bNAb currently  
243 being evaluated in clinical trials for use in HIV exposed infants. However, V3 glycan-specific  
244 bNAbs, which clustered together in neutralization sensitivity, and NIH45-46 mediated the most  
245 neutralization breadth and potency against the infant T/F viruses (Fig. 3).

246 We next calculated the geometric means of both the breadth and potency of the panel of bNAbs  
247 against the infant T/F viruses and compared with their potency against other HIV variants as  
248 documented in CATNAP (Compile, Analyze and Tally NAb Panels) [41], the Los Alamos  
249 National Laboratory (LANL) interface that collects all published immunological data. In general,  
250 potency and breadth of the bNAbs against infant T/F viruses followed the potency and breadth  
251 calculated in CATNAP (p=0.013 and 0.02 respectively, Spearman correlation test), with one  
252 exception: bNAb 2G12 displayed more potent and broad responses in the infants than in the  
253 CATNAP collective data (Fig. 3).

254 **Neutralization sensitivity of non-transmitted maternal *env* variants compared to infant T/F**  
255 ***env* variants**

256 Pseudoviruses were prepared from a total of 134 non-transmitted maternal *env* variants using the  
257 promoter PCR method [42] and assessed for neutralization sensitivity against paired maternal  
258 plasma, including the isolated maternal non-transmitted variant that was most closely related to  
259 the infant T/F variant. Variable neutralization sensitivity to paired maternal plasma was observed  
260 in non-transmitted maternal variants, with some of the variants exhibited neutralization  
261 sensitivity while others showed complete neutralization resistance (Fig. 4). Comparison of  
262 neutralization sensitivity between infant T/F Env variants and the identified closest maternal  
263 variant within each mother-infant pair revealed no consistent pattern. Over a 2-fold increase in  
264 sensitivity was observed for Env pseudoviruses of non-transmitted maternal variants that were  
265 most closely related to infant T/F for 6 infants (100002, 100307, 100052, 102149, 102407 and  
266 102605). In contrast, infant T/F Env pseudoviruses from 3 infants (100014, 100046 and 100504)  
267 were more sensitive to maternal plasma than their most closely related maternal variants.

268         Yet, the infant T/F viruses were generally more resistant to the maternal plasma at  
269 delivery than the non-transmitted viruses from mothers within each maternal-infant pair, with the  
270 exception of 100046. However, since there were only 1 or 2 T/F viruses in each infant, we could  
271 not perform statistical analysis to determine if the differences are statistically significant within  
272 each pair. To determine whether infant T/F viruses were overall more resistant to maternal  
273 plasma than the paired non-transmitted maternal viruses, we employed a 1-sided permutation test  
274 to compare the neutralization sensitivity of maternal non-transmitted variants to the infant T/F  
275 Env variants. Remarkably, infant T/F Env variants were overall significantly more resistant to  
276 paired maternal plasma collected at delivery than non-transmitted maternal Env variants

277 (p=0.01). Even when excluding the mother-infant pairs with high MLV neutralization (100014  
278 and 100504), the infant T/F Env variants remained more resistant to neutralization than non-  
279 transmitted maternal variants (p=0.005).

280 To assess whether any particular epitope-specific neutralization sensitivity was distinct in  
281 infant T/Fs compared to matched maternal variants, we determined the neutralization sensitivity  
282 of 4 bNAbs targeting distinct vulnerable epitopes on HIV-1 Env: VRC-01 (CD4bs-specific)  
283 (VRC-01), PG9 (V2 glycan-specific), DH429 (V3 glycan-specific), and DH512 (membrane  
284 proximal external region – MPER-specific) (Fig. 5). We used the same 1-sided permutation test  
285 described above to assess for differences in neutralization sensitivity to these bNAbs in infant  
286 T/Fs vs non-transmitted maternal sequences. Interestingly, we found that infant T/F viruses were  
287 significantly more resistant to DH512 (MPER-specific) compared to non-transmitted maternal  
288 sequences (p = 0.025 by 1-sided permutation test; p=0.045 when excluding the two mothers with  
289 non-specific neutralization), while all other comparisons yielded no statistical significance (Fig.  
290 5).

### 291 **Signature sequence analysis of infant T/F variants to predict neutralization resistance**

292 Because DH512 binds to the MPER region, we investigated the amino acid positions within  
293 this epitope (positions 662-683) and identified 4 positions that were either associated with higher  
294 maternal plasma neutralization (position 662, amino acid A, K, Q, or S were significantly more  
295 resistant than the wild type E, p=9.9e-05, 1-sided permutation test), lower DH512 IC<sub>50</sub> (position  
296 667 and 676, p=9.9e-04 and 0.003, respectively by 1-sided permutation test), or both (position  
297 683, amino acid R was significantly more resistant than the wild type K (most frequent AA at  
298 this position), p<1e-04 by 1-sided permutation test; Fig. 7). However, when we looked at the Env



299 sequences in individual mother-infant pairs, these amino acid residues that associated with  
300 DH512 neutralization resistance were equally distributed across non-transmitted maternal  
301 sequences and infant T/F viruses. Therefore, we could not to determine if T/F variants enriched  
302 for neutralization resistance-conferring amino acids were more apt to be transmitted compared to  
303 non-transmitted maternal variants. This could be due to the low sequence number within pairs, or  
304 it could suggest that the wild type amino acids at these positions are associated with DH512  
305 neutralization resistance but not necessarily transmission.

306

### 307 **V3 loop amino acid signature sequence analysis and neutralization sensitivity to paired** 308 **maternal plasma**

309 As maternal V3-specific IgG binding and tier 1 virus neutralizing responses were predictive of  
310 MTCT risk in this cohort [20], we explored possible signatures of neutralization resistance to  
311 paired maternal plasma in the V3 region. We examined the highly variable N and C-terminal  
312 region amino acid residues K305Q, I307T, H308T, R315Q, F317L, A319T, and D322R (Fig. 7),  
313 3 of which (K305Q, I307T, and H308T) have previously been identified critical targets of the  
314 V3-specific IgG responses associated with reduced MTCT risk [43]. Comparing non-transmitted  
315 maternal sequences and infant T/F viruses, we found position K305R to be significantly  
316 associated with higher sensitivity to paired maternal plasma ( $p < 0.001$  by 1-sided permutation  
317 test). At position 308, sequences carrying mutations from the consensus amino acid H (N, P, S or  
318 T) were significantly associated with higher neutralization resistance to paired maternal plasma  
319 ( $p < 0.001$  by 1-sided permutation test). However, as for the MPER residues, we observed that  
320 these amino acids were equally distributed across non-transmitted maternal and infant T/F virus  
321 sequences, indicating that none of these amino acid residues were directly involved with

322 transmission risk. This discrepancy could partially be due to the heterogeneity at amino acid  
323 residue position 308. Yet, 6 out of 14 transmitting mother-infant pairs exhibited distinct amino  
324 acid residues at position 308 from the more frequently occurring histidine (Fig. 7), suggesting  
325 variability at this position could be overrepresented in transmitting pairs.

## 326 **Discussion**

327 While maternal and infant ART has considerably reduced rates of MTCT, pediatric HIV  
328 infection remains a significant public health problem in areas of high HIV prevalence, with up to  
329 16% of HIV-infected women still transmitting the virus to their infant globally [1]. It is likely  
330 that a maternal or infant HIV-1 vaccine will be required to eliminate pediatric HIV [44].  
331 However, a better understanding of factors that may drive the genetic bottleneck of virus  
332 populations in the setting of MTCT of HIV will be required to develop vaccination strategies that  
333 can block HIV transmission. Recent findings published by our group demonstrated that maternal  
334 V3 loop-specific and tier 1 virus-neutralizing antibody responses both correlated and were  
335 independently associated with of reduced MTCT risk. Moreover, we established that V3-specific  
336 antibodies in maternal plasma could neutralize maternal autologous viral variants circulating in  
337 plasma [20, 27]. To examine the potential role of maternal Env-specific responses in driving the  
338 viral genetic bottleneck of MTCT, we aimed to define if neutralization resistance to maternal  
339 autologous virus neutralizing antibodies is a defining feature of infant T/F variants compared to  
340 circulating maternal non-transmitted plasma variants.

341 In this cohort, 6 out of 16 (37%) peripartum-infected infants were infected by at least 2 T/F  
342 viruses. Interestingly, infection with multiple T/F viruses occurs in approximately 19-24% of  
343 heterosexual HIV infections [24, 45, 46], and 12-38% of homosexual infections [47-49], whereas  
344 up to 60% of infections that occur through intravenous drug use involve multiple T/Fs [50].  
345 Thus, the rate of multiple T/F transmissions in this mother-infant cohort is in line with or slightly  
346 higher than sexual transmission modes, but lower than that of transmission via intravenous drug  
347 use. While it is well established that a genetic bottleneck occurs in the setting of MTCT, the  
348 determinants that drive the selection of 1 or multiple T/F viruses are less clear [4]. Importantly,

349 the lack of maternal ART prophylaxis around the time of delivery in the WITS cohort could  
350 contribute to the observed high rate of multiple T/F viruses, potentially stemming from a larger  
351 virus inoculum in this cohort compared to ARV-treated mothers. Regardless, of the impact of  
352 maternal ART on the bottleneck of infant T/F viruses, maternal or infant immunization strategies  
353 will likely need to generate Env-specific responses that can block the diverse pool of maternal  
354 viruses circulating in plasma. Notably, these infant T/F viruses uniformly represented a minor  
355 variant of the maternal viral population Env variants, indicating that maternal antibodies that can  
356 block infant virus transmission will need to target minor circulating variants.

357 A greater understanding of virologic characteristics of infant T/F viruses will also be  
358 important to developing immune-based strategies to prevent MTCT. As maternal V3-specific  
359 IgG responses predicted reduced risk of transmission in this cohort, we investigated V3 loop  
360 residues in the maternal and infant viruses and how they related to paired maternal plasma  
361 neutralization sensitivity. Despite the association between maternal V3-specific IgG responses  
362 targeting the C terminal region and reduced MTCT risk in this cohort [43], we did not find amino  
363 acid residues within the C terminal region to be associated neutralization resistance to paired  
364 maternal plasma. Instead, we found that maternal non-transmitted and infant T/F viruses carrying  
365 N, P, S or T at the N terminal region amino acid residue position 308 were more neutralization  
366 resistant to paired maternal plasma. These seemingly disparate findings could partly be explained  
367 by several reasons. Firstly, N terminal amino acid residues 308 and 309 have been shown to  
368 interact with C terminal amino acid residue 317, and this interaction leads to the stabilization of  
369 the V3 loop [51, 52]. Thus, the disruption of intra-peptide interactions at either the N and or C  
370 terminal region could lead to altered neutralization sensitivity of viruses to paired maternal V3-  
371 specific IgG plasma responses. Secondly, it should be noted that in this study, we compared

372 maternal non-transmitted circulating viruses to infant T/F viruses in 16 transmitting mother  
373 infant pairs, whereas we previously defined the potentially-protective role of maternal V3-  
374 specific IgG binding and neutralizing responses by comparing transmitting and non-transmitting  
375 women in the larger (n=248) WITS cohort [20, 43]. Finally, V3 loop accessibility to maternal  
376 neutralizing antibodies may be modulated by amino acid residues by distal amino acid residues  
377 within gp120 or gp41 [15]. For example, specific glycosylation sites within the V1 loop may  
378 alter V3 loop accessibility to V3-specific neutralizing antibodies [53]. Moreover, interactions  
379 between C2 and V3 may stabilize the structure of the HIV-1 Env [54], as demonstrated with the  
380 recent elucidation of the SOSIP trimer [55].

381 In contrast to previous studies that examined the neutralization sensitivity of randomly  
382 selected or non-paired infant or maternal virus isolates, our study defined the neutralization  
383 sensitivity of paired infant T/F viruses and maternal non-transmitted variants. Moreover, our  
384 study accounted for phylogenetic relationships of infant T/F viruses and maternal non-  
385 transmitted variants to represent the diverse maternal virus lineage pools. Furthermore, our study  
386 carefully controlled for analysis confounders such as transmission mode, disparate maternal and  
387 infant sample testing. Moreover, as the WITS cohort was enrolled and followed prior to the  
388 availability of ART to prevent MTCT, virus variant selection in this cohort is not influenced by  
389 ART selection pressures. With this robust study design, our analysis demonstrated that infant T/F  
390 viruses are mostly resistant to concurrent autologous maternal plasma, suggesting that infant T/F  
391 viruses are defined by neutralization resistance to maternal autologous virus neutralizing  
392 antibodies. This work confirms previous studies that have made this prediction based on smaller  
393 studies or with less well-defined maternal and infant virus variants [16, 56, 57]. Yet, Miligan *et*.  
394 *al* [58] recently showed that neutralization resistant viruses do not predict MTCT risk in a

395 breastfeeding transmission setting. However, as our analysis focused on peripartum transmission  
396 only, there may be distinct virologic or immunologic determinants in peripartum and postpartum  
397 HIV transmission. Yet an important, a novel observation gleaned this study is that infant T/F  
398 viruses' neutralization resistance to maternal plasma is not predictive of neutralization resistance  
399 to heterologous plasma. Remarkably, the tiered categorization of infant T/F viruses ranged from  
400 easy to neutralize tier 1 a viruses, to very difficult to neutralize tier 3 viruses, suggesting that  
401 heterologous plasma neutralization resistance is not a defining feature of infant T/F viruses.  
402 Specifically, 24% of infant T/F viruses isolated in this study were classified as “easy to  
403 neutralize” tier 1b or tier 1a variants by a standard panel of heterologous plasma [40], consistent  
404 with the hypothesis that these infant T/F viruses may be specifically resistant to maternal  
405 antibodies that co-evolved with the transmitted variants.

406 Not unsurprisingly, the majority of infant T/F viruses were neutralization sensitive to a  
407 number of second generation broadly neutralizing antibodies (Fig. 4). This finding is clinically  
408 relevant, as it suggests that infant passive immunization with second generation broad and potent  
409 bNAbs to prevent HIV-1 transmission could be an effective strategy to block MTCT.  
410 Interestingly, there is an ongoing passive immunization clinical trial of high-risk, HIV-exposed  
411 infants with VRC01 (<https://clinicaltrials.gov/ct2/show/record/NCT02256631>). The uniform  
412 sensitivity of these clade B infant T/F viruses isolated in our study to VRC01 neutralization  
413 suggests that these viruses would be effectively neutralized by VRC01, suggesting that clade B  
414 infant virus transmission may be blocked by VRC01.

415 To our knowledge, this is the largest study that has characterized infant T/F and maternal  
416 viruses and their neutralization sensitivity to maternal autologous virus neutralizing responses.

417 Our study specifically addresses whether infant T/F viruses are defined by their neutralization  
418 sensitivity to maternal autologous virus neutralizing antibodies in peripartum MTCT of HIV.  
419 MTCT is a unique setting in which protective antibodies only need block autologous virus  
420 variants circulating in blood to which the infant is exposed. The observation that infant T/F  
421 viruses are neutralization resistant compared to non-transmitted maternal variants suggests that  
422 the development of a maternal vaccine that boosts maternal autologous virus neutralizing  
423 responses may be a viable strategy to further reduce MTCT risk. Maternal Env immunization  
424 regimens with closely related, but not identical, Envs to maternal circulating virus populations  
425 may elicit antibodies that target her autologous virus pool through the well-described immune  
426 phenomenon of ‘original antigenic sin’ [59, 60]. Our central finding that maternal autologous  
427 virus neutralization shapes the genetic bottleneck of peripartum transmission has important  
428 implications in designing maternal Env vaccination strategies that can synergize with current  
429 maternal ART treatment strategies help achieve an HIV-free generation.

## 430 **Materials and Methods**

### 431 **Study Subjects and sample collection**

432 Maternal and infant pairs from the WITS cohort that met the following criteria were selected:  
433 peripartum transmission, infant plasma samples from < 2.5 months of age, and maternal samples  
434 available from around delivery. Peripartum transmission was defined by negative a negative  
435 PCR result or negative culture from peripheral blood samples collected within 7 days of birth  
436 with subsequent a positive result 7 days after birth (Table 1).

437

### 438 **Ethics Statement**

439 Samples used in this study were obtained from an existing cohort named as Women Infant  
440 Transmission Study (WITS). WITS cohort samples were received as de-identified material and  
441 were deemed as research not involving human subjects by Duke University Institutional Review  
442 Board (IRB). The reference number for that protocol and determination is Pro00016627.

### 443 **Viral RNA Extraction and SGA isolation**

444 Viral RNA was purified from the plasma sample from each patient by the Qiagen QiaAmp viral  
445 RNA mini kit and subjected to cDNA synthesis using 1X reaction buffer, 0.5 mM of each  
446 deoxynucleoside triphosphate (dNTP), 5 mM DTT, 2 U/mL RNaseOUT, 10 U/mL of  
447 SuperScript III reverse transcription mix (Invitrogen), and 0.25 mM antisense primer 1.R3.B3R  
448 (5'-ACTACTTGAAGCACTCAAGGCAAGCT TTATTG-3'), located in the *nef* open reading  
449 frame. The resulting cDNA was end-point diluted in 96 well plates (Applied Biosystems, Inc.)  
450 and PCR amplified using Platinum Taq DNA polymerase High Fidelity (Invitrogen) so that <  
451 30% of reactions were positive in order to maximize the likelihood of amplification from a single



452 genome. A second round of PCR amplification was conducted using 2µl of the first round  
453 products as template. 07For7 (5'-AAATTAYAAAAATTCAAATTTTCGGGTTTATTACAG-  
454 3') and 2.R3.B6R (5'- TGA AGCACTCAAGGCAAGCTTTATTGAGGC -3') were used as  
455 primer pair in the first round of PCR amplification step, followed by a second round with  
456 primers VIF1 (5'- GGGTTTATTACAGGGACAGCAGAG -3')(nt 5960–5983 in the HXB2 tat  
457 coding region) and Low2c (5'- TGAGGCT TAAGCAGTGGGTT CC -3') (nt 9413–9436 in  
458 HXB2 nef). PCR was carried out using 1X buffer, 2 mM MgSO<sub>4</sub>, 0.2 mM of each dNTP, 0.2µM  
459 of each primer, and 0.025 U/µl Platinum Taq High Fidelity polymerase (Invitrogen) in a 20µl  
460 reaction. Round 1 amplification conditions were 1 cycle of 94°C for 2 minutes, 35 cycles of  
461 94°C for 15 seconds, 58°C for 30 seconds, and 68°C for 4 minutes, followed by 1 cycle of 68°C  
462 for 10 minutes. Round 2 conditions were one cycle of 94°C for 2 minutes, 45 cycles of 94°C for  
463 15 seconds, 58°C for 30 seconds, and 68°C for 4 minutes, followed by 1 cycle of 68°C for 10  
464 minutes. Round 2 PCR amplicons were visualized by agarose gel electrophoresis and sequenced  
465 for envelope gene using an ABI3730xl genetic analyzer (Applied Biosystems). The final  
466 amplification 3'-half genome product was ~4160 nucleotides in length exclusive of primer  
467 sequences and included all of *rev* and *env* gp160, and 336 nucleotides of *nef*. Partially  
468 overlapping sequences from each amplicon were assembled and edited using Sequencher (Gene  
469 Codes, Inc). Sequences with double peaks per base read were discarded. Sequences with one  
470 double peak were retained as this most likely represents a Taq polymerase error in an early round  
471 of PCR rather than multiple template amplification; such sequence ambiguities were read as the  
472 consensus nucleotide. Sequence alignments and phylogenetic trees were constructed using  
473 ClustalW and Highlighter plots were created using the tool at  
474 [https://www.hiv.lanl.gov/content/sequence/HIGHLIGHT/highlighter\\_top.html](https://www.hiv.lanl.gov/content/sequence/HIGHLIGHT/highlighter_top.html).

## 475 **Sequence Alignment**

476 All maternal and infant envelope sequences were aligned using the Gene Cutter tool available at  
477 the Los Alamos National Laboratory (LANL) website  
478 ([http://www.hiv.lanl.gov/content/sequence/GENE\\_CUTTER/cutter.html](http://www.hiv.lanl.gov/content/sequence/GENE_CUTTER/cutter.html)) and then refined  
479 manually. Full-length envelope sequences were manually trimmed in Seaview [61]. The infant  
480 T/F env virus sequences were visually identified looking at phylogenetic trees and highlighter  
481 plots, and infant consensus sequences of the major T/F lineage were created using the LANL  
482 Consensus Maker tool  
483 (<http://www.hiv.lanl.gov/content/sequence/CONSENSUS/consensus.html>). For infants that were  
484 infected by 2 or more distinct T/F viruses, the highlighter plots and phylogenetic trees were  
485 rooted on the consensus of the major variant.

## 486 **Infant T/F Virus Envelope Characterization**

487 Maternal and infant envelope alignments were characterized using Bio-NJ phylogeny (Mega 6  
488 Software) and highlighter plot  
489 ([http://www.hiv.lanl.gov/content/sequence/HIGHLIGHT/HIGHLIGHT\\_XYLOT/highlighter.ht](http://www.hiv.lanl.gov/content/sequence/HIGHLIGHT/HIGHLIGHT_XYLOT/highlighter.html)  
490 [ml](http://www.hiv.lanl.gov/content/sequence/HIGHLIGHT/HIGHLIGHT_XYLOT/highlighter.html)). The number of infant T/F viruses was determined by visual inspection of both phylogenetic  
491 trees and highlighter plots of infant-maternal env sequence alignments. Hypermutation was also  
492 evaluated using the tool Hypermut  
493 (<http://www.hiv.lanl.gov/content/sequence/HYPERMUT/hypermut.html>). Sequences with  
494 significant hypermutation ( $p < 0.1$ ) were removed from the alignment and not included in further  
495 analysis. When a sample was found to be overall enriched for hypermutation [24], positions  
496 within the APOBEC signature context were removed (Table 2). All 16 infant infections were  
497 acute and we were able to time the infection using the Poisson Fitter method after removing

498 putative recombinants and/or hypermutated sequences as described above. Days since infant  
499 infection were calculated using the Poisson Fitter tool  
500 ([http://www.hiv.lanl.gov/content/sequence/POISSON\\_FITTER/pfitter.html](http://www.hiv.lanl.gov/content/sequence/POISSON_FITTER/pfitter.html)) which estimates the  
501 time since infection based on the accumulation of random mutations from the most recent  
502 common ancestor (MRCA) [39]. For infants infected with 2 or more T/F viruses, only the major  
503 variant was analyzed to obtain the time since the infection. The defined mutation rate was 2.16e-  
504 5. Values were reported in days with a 95% confidence interval and a goodness-of-fit p-value.

### 505 **Infant T/F SGA Cloning**

506 Amplicons from the first round PCR product that matched the infant consensus sequence  
507 (T/F virus sequence) were ligated into pcDNA3.1 Directional Topo vectors (Invitrogen) by  
508 introducing a –CACC 5' end via a PCR reaction with the primers Rev19 (5'-  
509 ACTTTTGGACCACTTGCCACCCAT-3') and Env1A (5'-caccTTAGGCATCTCCT  
510 ATGGCAGGAAGAAG-3'). Phusion® High-Fidelity PCR Master Mix with HF Buffer was  
511 used according to the manufacturer's instructions (New England BioLabs). Plasmids were then  
512 transformed into XL10 gold chemically competent Escherichia coli cells. Cultures were grown at  
513 37°C for 16 hours. Colonies were selected for growth, and plasmids were minipreped and quality  
514 controlled by restriction enzyme digestion using BamHI and XhoI (New England BioLabs).  
515 Plasmids containing an insert of correct size were sequenced to confirm 100% sequence  
516 homology with the original env infant consensus sequence. Plasmids were then prepared by  
517 Megaprep (Qiagen) kit and re-sequenced to confirm. For three infants, 100046, 100383 and  
518 101580, no single genome isolated matched 100% of nucleotides in the consensus sequence.  
519 Therefore site-directed mutagenesis on a single nucleotide was performed to create an isolate  
520 identical to the consensus sequence. Primers for site directed mutagenesis were designed using

521 Agilent's QuikChange primer design program and Agilent's QuikChange II XL kit was used.  
522 Sequencing of the clones was done to ensure 100% homology with the infant consensus  
523 sequence.

#### 524 **Pseudovirus preparation**

525 Env pseudoviruses were prepared by transfection in HEK293T (ATCC, Manassas, VA) cells  
526 with 4 $\mu$ g of env plasmid DNA and 4 $\mu$ g of env-deficient HIV plasmid DNA using the FuGene 6  
527 transfection reagent (Roche Diagnostics) in a T75 flask. Two days after transfection, the culture  
528 supernatant containing pseudoviruses was harvested, filtered, aliquoted, and stored at -80°C. An  
529 aliquot of frozen pseudovirus was used to measure the infectivity in TZM-bl cells. 20 $\mu$ l of  
530 pseudovirus was distributed in duplicate to 96-well flat bottom plates (Co-star). Then, freshly  
531 trypsinized TZM-bl cells were added (10,000 cells/well in Dulbecco's modified Eagle's medium  
532 (DMEM)-10% fetal bovine serum (FBS) containing HEPES and 10  $\mu$  g/ml of DEAE-dextran).  
533 After 48 h of incubation at 37°C, 100 $\mu$ l of medium was removed from the wells. 100 $\mu$ l of  
534 luciferase reagent was added to each well and incubated at room temperature for 2 min. 100 $\mu$ l of  
535 the lysate was transferred to a 96-well black solid plate (Costar), and the luminescence was  
536 measured using the Bright-Glo™ luminescence reporter gene assay system (Promega).

#### 537 **Neutralization Assays**

538 Neutralizing antibody activity was measured in 96-well culture plates by using Tat-regulated  
539 luciferase (Luc) reporter gene expression to quantify reductions in virus infection in TZM-bl  
540 cells. TZM-bl cells were obtained from the NIH AIDS Research and Reference Reagent  
541 Program, as contributed by John Kappes and Xiaoyun Wu. Assays were performed with HIV-1  
542 Env-pseudotyped viruses as described previously [62]. Test samples were diluted over a range of

543 1:20 to 1:43740 in cell culture medium and pre-incubated with virus (~150,000 relative light unit  
544 equivalents) for 1 hr at 37°C before addition of cells. Following a 48 hr incubation, cells were  
545 lysed and Luc activity determined using a microtiter plate luminometer and BriteLite Plus  
546 Reagent (Perkin Elmer). Neutralization titers are the sample dilution (for serum/plasma) or  
547 antibody concentration (for sCD4, purified IgG preparations and monoclonal antibodies) at  
548 which relative luminescence units (RLU) were reduced by 50% compared to RLU in virus  
549 control wells after subtraction of background RLU in cell control wells. Serum/plasma samples  
550 were heat-inactivated at 56°C for 1 hr prior to assay. Murine leukemia virus SVA.MLV was used  
551 as a negative control [40]. A response was considered positive if the plasma ID<sub>50</sub> against infant  
552 T/F viruses was at least 3 times higher than the ID<sub>50</sub> versus SVA.MLV.

### 553 **Env Virus Variant Tier Phenotyping Assay**

554 Neutralization titers (ID<sub>50</sub>s) were determined essentially as described above using five plasma  
555 samples from HIV+ individuals in chronic infection. The geometric mean titer (GMT) was  
556 calculated in Microsoft Excel and tier phenotype was determined by comparing these values to  
557 the GMTs of standard panels of viruses representing tier 1A, tier 1B and tier 2 viruses [40, 63]  
558 using the same five HIV+ plasma samples.

### 559 **Sequence Selection Algorithm**

560 To select maternal non-transmitted variants and capture the most divergent sequences from the  
561 infant T/F, we devised an algorithm as follows. The algorithm finds the most variable positions  
562 in the amino acid alignment and ranks all sequences with respect to the frequencies at these  
563 positions. Sequences are then selected starting from the most divergent based on motif coverage

564 as observed in the alignment and in the phylogenetic tree (in other words, if a group of diverging  
565 sequences all share the same motif, only one in the group and/or tree node is selected).

## 566 **Statistical Analysis**

567 To test whether infant transmitted viruses were statistically significantly more resistant to  
568 maternal plasma than non-transmitted maternal sequences, we devised a 1-sided permutation  
569 test. At each iteration, we randomly assigned the “transmitted” status to any one sequence in  
570 each infant-mother pair, and then ranked the remaining sequences in the pair according to  
571 maternal plasma responses. All ranks across all pairs were then summed. We repeated this  
572 randomization 1,000 times and then calculated the p-value as the percentage of sum of ranks that  
573 were above the observed sum of ranks, out of all randomizations performed. This method is  
574 robust, as it does not make any underlying assumption of the distribution of the maternal  
575 plasmas, and it preserves the within mother-infant correlation of the data. The same algorithm  
576 was used to test whether specific amino acid positions conferred resistance to maternal plasma  
577 and/or antibodies. This time the “transmitted” status that was reshuffled at each iteration was the  
578 wild type amino acid.

## 579 **Acknowledgements**

580 We acknowledge Nathan Vandergrift in selecting peripartum transmission samples from the WITS  
581 cohort.

## 582 **References**

- 583 1. UNAIDS. Progress Report on the Global Plan: towards the elimi- nation of new HIV  
584 infections among children and keeping their mothers alive. UNAIDS, Geneva, Switzerland.  
585 2015.
- 586 2. Mahy M, Stover J, Kiragu K, Hayashi C, Akwara P, Luo C, et al. What will it take to  
587 achieve virtual elimination of mother-to-child transmission of HIV? An assessment of current  
588 progress and future needs. *Sex Transm Infect.* 2010;86 Suppl 2:ii48-55.
- 589 3. Dorenbaum A, Cunningham CK, Gelber RD, Culnane M, Mofenson L, Britto P, et al. Two-  
590 dose intrapartum/newborn nevirapine and standard antiretroviral therapy to reduce perinatal HIV  
591 transmission: a randomized trial. *JAMA.* 2002;288(2):189-98.
- 592 4. Wolinsky SM, Wike CM, Korber BT, Hutto C, Parks WP, Rosenblum LL, et al. Selective  
593 transmission of human immunodeficiency virus type-1 variants from mothers to infants. *Science.*  
594 1992;255(5048):1134-7.
- 595 5. Garcia PM, Kalish LA, Pitt J, Minkoff H, Quinn TC, Burchett SK, et al. Maternal levels of  
596 plasma human immunodeficiency virus type 1 RNA and the risk of perinatal transmission.  
597 Women and Infants Transmission Study Group. *N Engl J Med.* 1999;341(6):394-402.
- 598 6. Katz IT, Shapiro R, Li D, Govindarajulu U, Thompson B, Watts DH, et al. Risk factors for  
599 detectable HIV-1 RNA at delivery among women receiving highly active antiretroviral therapy  
600 in the women and infants transmission study. *J Acquir Immune Defic Syndr.* 2010;54(1):27-34.
- 601 7. Magder LS, Mofenson L, Paul ME, Zorrilla CD, Blattner WA, Tuomala RE, et al. Risk  
602 factors for in utero and intrapartum transmission of HIV. *J Acquir Immune Defic Syndr.*  
603 2005;38(1):87-95.



- 604 8. Bongertz V, Costa CI, Veloso VG, Grinsztejn B, Filho EC, Calvet G, et al. Neutralization  
605 titres and vertical HIV-1 transmission. *Scand J Immunol.* 2002;56(6):642-4.
- 606 9. Bongertz V, Costa CI, Veloso VG, Grinsztejn B, Joao Filho EC, Calvet G, et al. Vertical  
607 HIV-1 transmission: importance of neutralizing antibody titer and specificity. *Scand J Immunol.*  
608 2001;53(3):302-9.
- 609 10. Scarlatti G, Albert J, Rossi P, Hodara V, Biraghi P, Muggiasca L, et al. Mother-to-child  
610 transmission of human immunodeficiency virus type 1: correlation with neutralizing antibodies  
611 against primary isolates. *J Infect Dis.* 1993;168(1):207-10.
- 612 11. Braibant M, Barin F. The role of neutralizing antibodies in prevention of HIV-1 infection:  
613 what can we learn from the mother-to-child transmission context? *Retrovirology.* 2013;10:103.
- 614 12. Blish CA, Blay WM, Haigwood NL, Overbaugh J. Transmission of HIV-1 in the face of  
615 neutralizing antibodies. *Curr HIV Res.* 2007;5(6):578-87.
- 616 13. Mutucumarana CP, Eudailey J, McGuire EP, Vandergrift N, Tegha G, Chasela C, et al.  
617 Maternal Humoral Immune Correlates of Peripartum Transmission of Clade C HIV-1 in the  
618 Setting of Peripartum Antiretrovirals. *Clin Vaccine Immunol.* 2017;24(8).
- 619 14. Overbaugh J. Mother-infant HIV transmission: do maternal HIV-specific antibodies protect  
620 the infant? *PLoS Pathog.* 2014;10(8):e1004283.
- 621 15. Zolla-Pazner S, Cohen SS, Boyd D, Kong XP, Seaman M, Nussenzweig M, et al.  
622 Structure/Function Studies Involving the V3 Region of the HIV-1 Envelope Delineate Multiple  
623 Factors That Affect Neutralization Sensitivity. *J Virol.* 2015;90(2):636-49.
- 624 16. Wu X, Parast AB, Richardson BA, Nduati R, John-Stewart G, Mbori-Ngacha D, et al.  
625 Neutralization escape variants of human immunodeficiency virus type 1 are transmitted from  
626 mother to infant. *J Virol.* 2006;80(2):835-44.

- 627 17. Fouda GG, Mahlokozera T, Salazar-Gonzalez JF, Salazar MG, Learn G, Kumar SB, et al.  
628 Postnatally-transmitted HIV-1 Envelope variants have similar neutralization-sensitivity and  
629 function to that of nontransmitted breast milk variants. *Retrovirology*. 2013;10:3.
- 630 18. Russell ES, Kwiek JJ, Keys J, Barton K, Mwapasa V, Montefiori DC, et al. The genetic  
631 bottleneck in vertical transmission of subtype C HIV-1 is not driven by selection of especially  
632 neutralization-resistant virus from the maternal viral population. *J Virol*. 2011;85(16):8253-62.
- 633 19. Thenin S, Samleerat T, Tavernier E, Ngo-Giang-Huong N, Jourdain G, Lallemand M, et al.  
634 Envelope glycoproteins of human immunodeficiency virus type 1 variants issued from mother-  
635 infant pairs display a wide spectrum of biological properties. *Virology*. 2012;426(1):12-21.
- 636 20. Permar SR, Fong Y, Vandergrift N, Fouda GG, Gilbert P, Parks R, et al. Maternal HIV-1  
637 envelope-specific antibody responses and reduced risk of perinatal transmission. *J Clin Invest*.  
638 2015;125(7):2702-6.
- 639 21. Chasela CS, Hudgens MG, Jamieson DJ, Kayira D, Hosseinipour MC, Kourtis AP, et al.  
640 Maternal or infant antiretroviral drugs to reduce HIV-1 transmission. *N Engl J Med*.  
641 2010;362(24):2271-81.
- 642 22. Rich KC, Fowler MG, Mofenson LM, Abboud R, Pitt J, Diaz C, et al. Maternal and infant  
643 factors predicting disease progression in human immunodeficiency virus type 1-infected infants.  
644 Women and Infants Transmission Study Group. *Pediatrics*. 2000;105(1):e8.
- 645 23. Baalwa J, Wang S, Parrish NF, Decker JM, Keele BF, Learn GH, et al. Molecular  
646 identification, cloning and characterization of transmitted/founder HIV-1 subtype A, D and A/D  
647 infectious molecular clones. *Virology*. 2013;436(1):33-48.

- 648 24. Keele BF, Giorgi EE, Salazar-Gonzalez JF, Decker JM, Pham KT, Salazar MG, et al.  
649 Identification and characterization of transmitted and early founder virus envelopes in primary  
650 HIV-1 infection. *Proc Natl Acad Sci U S A*. 2008;105(21):7552-7.
- 651 25. Nakamura KJ, Heath L, Sobrera ER, Wilkinson TA, Semrau K, Kankasa C, et al. Breast  
652 milk and in utero transmission of HIV-1 select for envelope variants with unique molecular  
653 signatures. *Retrovirology*. 2017;14(1):6.
- 654 26. Tobin NH, Aldrovandi GM. Immunology of pediatric HIV infection. *Immunol Rev*.  
655 2013;254(1):143-69.
- 656 27. Moody MA, Gao F, Gurley TC, Amos JD, Kumar A, Hora B, et al. Strain-Specific V3 and  
657 CD4 Binding Site Autologous HIV-1 Neutralizing Antibodies Select Neutralization-Resistant  
658 Viruses. *Cell Host Microbe*. 2015;18(3):354-62.
- 659 28. Learn GH, Muthui D, Brodie SJ, Zhu T, Diem K, Mullins JI, et al. Virus population  
660 homogenization following acute human immunodeficiency virus type 1 infection. *J Virol*.  
661 2002;76(23):11953-9.
- 662 29. Derdeyn CA, Decker JM, Bibollet-Ruche F, Mokili JL, Muldoon M, Denham SA, et al.  
663 Envelope-constrained neutralization-sensitive HIV-1 after heterosexual transmission. *Science*.  
664 2004;303(5666):2019-22.
- 665 30. Zhang LQ, MacKenzie P, Cleland A, Holmes EC, Brown AJ, Simmonds P. Selection for  
666 specific sequences in the external envelope protein of human immunodeficiency virus type 1  
667 upon primary infection. *J Virol*. 1993;67(6):3345-56.
- 668 31. Gantt S, Carlsson J, Heath L, Bull ME, Shetty AK, Mutsvangwa J, et al. Genetic analyses of  
669 HIV-1 env sequences demonstrate limited compartmentalization in breast milk and suggest viral  
670 replication within the breast that increases with mastitis. *J Virol*. 2010;84(20):10812-9.

- 671 32. Kishko M, Somasundaran M, Brewster F, Sullivan JL, Clapham PR, Luzuriaga K.  
672 Genotypic and functional properties of early infant HIV-1 envelopes. *Retrovirology*. 2011;8:67.
- 673 33. Haynes BF BT. Broadly Neutralizing Antibodies and the Development of Vaccines. *JAMA*.  
674 2015;313(24):2419–20.
- 675 34. Klein F, Mouquet H, Dosenovic P, Scheid JF, Scharf L, Nussenzweig MC. Antibodies in  
676 HIV-1 vaccine development and therapy. *Science*. 2013;341(6151):1199-204.
- 677 35. Gautam R, Nishimura Y, Pegu A, Nason MC, Klein F, Gazumyan A, et al. A single  
678 injection of anti-HIV-1 antibodies protects against repeated SHIV challenges. *Nature*.  
679 2016;533(7601):105-9.
- 680 36. Lynch RM, Boritz E, Coates EE, DeZure A, Madden P, Costner P, et al. Virologic effects of  
681 broadly neutralizing antibody VRC01 administration during chronic HIV-1 infection. *Sci Transl*  
682 *Med*. 2015;7(319):319ra206.
- 683 37. Voronin Y, Mofenson LM, Cunningham CK, Fowler MG, Kaleebu P, McFarland EJ, et al.  
684 HIV monoclonal antibodies: a new opportunity to further reduce mother-to-child HIV  
685 transmission. *PLoS Med*. 2014;11(4):e1001616.
- 686 38. Ledgerwood JE, Coates EE, Yamshchikov G, Saunders JG, Holman L, Enama ME, et al.  
687 Safety, pharmacokinetics and neutralization of the broadly neutralizing HIV-1 human  
688 monoclonal antibody VRC01 in healthy adults. *Clin Exp Immunol*. 2015;182(3):289-301.
- 689 39. Giorgi EE, Funkhouser B, Athreya G, Perelson AS, Korber BT, Bhattacharya T. Estimating  
690 time since infection in early homogeneous HIV-1 samples using a poisson model. *BMC*  
691 *Bioinformatics*. 2010;11:532.

- 692 40. Seaman MS, Janes H, Hawkins N, Grandpre LE, Devoy C, Giri A, et al. Tiered  
693 categorization of a diverse panel of HIV-1 Env pseudoviruses for assessment of neutralizing  
694 antibodies. *J Virol.* 2010;84(3):1439-52.
- 695 41. Yoon H, Macke J, West AP, Jr., Foley B, Bjorkman PJ, Korber B, et al. CATNAP: a tool to  
696 compile, analyze and tally neutralizing antibody panels. *Nucleic Acids Res.* 2015;43(W1):W213-  
697 9.
- 698 42. Kirchherr JL, Lu X, Kasongo W, Chalwe V, Mwananyanda L, Musonda RM, et al. High  
699 throughput functional analysis of HIV-1 env genes without cloning. *J Virol Methods.*  
700 2007;143(1):104-11.
- 701 43. Martinez DR, Vandergrift N, Douglas AO, McGuire E, Bainbridge J, Nicely NI, et al.  
702 Maternal Binding and Neutralizing IgG Responses Targeting the C-Terminal Region of the V3  
703 Loop Are Predictive of Reduced Peripartum HIV-1 Transmission Risk. *J Virol.* 2017;91(9).
- 704 44. Fouda GG, Cunningham CK, Permar SR. Infant HIV-1 vaccines: supplementing strategies  
705 to reduce maternal-child transmission. *JAMA.* 2015;313(15):1513-4.
- 706 45. Grobler J, Gray CM, Rademeyer C, Seoighe C, Ramjee G, Karim SA, et al. Incidence of  
707 HIV-1 dual infection and its association with increased viral load set point in a cohort of HIV-1  
708 subtype C-infected female sex workers. *J Infect Dis.* 2004;190(7):1355-9.
- 709 46. Sagar M, Kirkegaard E, Long EM, Celum C, Buchbinder S, Daar ES, et al. Human  
710 immunodeficiency virus type 1 (HIV-1) diversity at time of infection is not restricted to certain  
711 risk groups or specific HIV-1 subtypes. *J Virol.* 2004;78(13):7279-83.
- 712 47. Chen Y, Li N, Zhang T, Huang X, Cai F, Vandergrift N, et al. Comprehensive  
713 Characterization of the Transmitted/Founder env Genes From a Single MSM Cohort in China. *J*  
714 *Acquir Immune Defic Syndr.* 2015;69(4):403-12.

- 715 48. Li H, Bar KJ, Wang S, Decker JM, Chen Y, Sun C, et al. High Multiplicity Infection by  
716 HIV-1 in Men Who Have Sex with Men. *PLoS Pathog.* 2010;6(5):e1000890.
- 717 49. Kazennova E, Laga V, Gromov K, Lebedeva N, Zhukova E, Pronin A, et al. Genetic  
718 Variants of HIV Type 1 in Men Who Have Sex with Men in Russia. *AIDS Res Hum*  
719 *Retroviruses.* 2017.
- 720 50. Bar KJ, Li H, Chamberland A, Tremblay C, Routy JP, Grayson T, et al. Wide variation in  
721 the multiplicity of HIV-1 infection among injection drug users. *J Virol.* 2010;84(12):6241-7.
- 722 51. Jiang X, Burke V, Totrov M, Williams C, Cardozo T, Gorny MK, et al. Conserved structural  
723 elements in the V3 crown of HIV-1 gp120. *Nat Struct Mol Biol.* 2010;17(8):955-61.
- 724 52. Stanfield RL, Gorny MK, Zolla-Pazner S, Wilson IA. Crystal structures of human  
725 immunodeficiency virus type 1 (HIV-1) neutralizing antibody 2219 in complex with three  
726 different V3 peptides reveal a new binding mode for HIV-1 cross-reactivity. *J Virol.*  
727 2006;80(12):6093-105.
- 728 53. Losman B, Bolmstedt A, Schonning K, Bjorndal A, Westin C, Fenyo EM, et al. Protection  
729 of neutralization epitopes in the V3 loop of oligomeric human immunodeficiency virus type 1  
730 glycoprotein 120 by N-linked oligosaccharides in the V1 region. *AIDS Res Hum Retroviruses.*  
731 2001;17(11):1067-76.
- 732 54. Willey RL, Martin MA. Association of human immunodeficiency virus type 1 envelope  
733 glycoprotein with particles depends on interactions between the third variable and conserved  
734 regions of gp120. *J Virol.* 1993;67(6):3639-43.
- 735 55. Lyumkis D, Julien JP, de Val N, Cupo A, Potter CS, Klasse PJ, et al. Cryo-EM structure of  
736 a fully glycosylated soluble cleaved HIV-1 envelope trimer. *Science.* 2013;342(6165):1484-90.

- 737 56. Dickover R, Garratty E, Yusim K, Miller C, Korber B, Bryson Y. Role of maternal  
738 autologous neutralizing antibody in selective perinatal transmission of human immunodeficiency  
739 virus type 1 escape variants. *J Virol*. 2006;80(13):6525-33.
- 740 57. Rainwater SM, Wu X, Nduati R, Nedellec R, Mosier D, John-Stewart G, et al. Cloning and  
741 characterization of functional subtype A HIV-1 envelope variants transmitted through  
742 breastfeeding. *Curr HIV Res*. 2007;5(2):189-97.
- 743 58. Milligan C, Omenda MM, Chohan V, Odem-Davis K, Richardson BA, Nduati R, et al.  
744 Maternal Neutralization-Resistant Virus Variants Do Not Predict Infant HIV Infection Risk.  
745 *MBio*. 2016;7(1):e02221-15.
- 746 59. Kim JH, Skountzou I, Compans R, Jacob J. Original antigenic sin responses to influenza  
747 viruses. *J Immunol*. 2009;183(5):3294-301.
- 748 60. Park MS, Kim JI, Park S, Lee I, Park MS. Original Antigenic Sin Response to RNA Viruses  
749 and Antiviral Immunity. *Immune Netw*. 2016;16(5):261-70.
- 750 61. Gouy M, Guindon S, Gascuel O. SeaView version 4: A multiplatform graphical user  
751 interface for sequence alignment and phylogenetic tree building. *Mol Biol Evol*. 2010;27(2):221-  
752 4.
- 753 62. Montefiori DC. Measuring HIV neutralization in a luciferase reporter gene assay. *Methods*  
754 *Mol Biol*. 2009;485:395-405.
- 755 63. Li M, Gao F, Mascola JR, Stamatatos L, Polonis VR, Koutsoukos M, et al. Human  
756 immunodeficiency virus type 1 env clones from acute and early subtype B infections for  
757 standardized assessments of vaccine-elicited neutralizing antibodies. *J Virol*. 2005;79(16):10108-  
758 25.

759 **Supporting Information**

760 **Fig. S1 Phylogenetic tree and highlighter plot for all other 12 mother infant pairs.** Infant  
761 sequences are labeled in red circles and maternal sequences are labeled in blue squares.

762

763 **Fig. S2 Phylogenetic tree and highlighter plot for mother infant pair 102605.** Infant  
764 sequences are labeled in red and maternal sequences are labeled in blue. The non-random  
765 accumulation of synonymous mutations in the infant (which caused the Poisson Fitter analysis to  
766 fail) is evident on the right as marked by red box.

767

768 **Fig. S3 Neutralization sensitivity of Infant T/F viruses to heterologous broadly neutralizing**  
769 **antibodies (bNAbs).** Dark colors represent easily neutralized viruses. Second T/F viruses are  
770 marked with an \*.



## 771 **Figure legends**

### 772 **Fig. 1 Highlighter plots of maternal and infant viruses**

773 Example of mother-infant pair where the infant was infected with a single T/F virus and no  
774 evidence of evolutionary selection in the infant (3/16 infants) (A). Example of mother infant with  
775 evidence of evolutionary selection in the infant (B), and Example of mother infant pair where the  
776 infant was infected by two distinct T/F viruses (6/16) infants (C). Individual infant and maternal  
777 viruses are represented by red dots and blue squares, respectively, on the tree. Colored hash marks  
778 on each highlighter plot represent nucleotide differences as compared with the infant consensus  
779 sequence at the top and are color-coded according to nucleotide.

780

### 781 **Fig. 2: Tier phenotyping and neutralization sensitivity of Infant T/F viruses to paired**

782 **maternal plasma and heterologous broadly neutralizing antibodies (bNAbs).** Dark colors  
783 represent easily neutralized viruses. Second T/F viruses are marked with a star (\*).

784

### 785 **Fig. 3 Infant neutralization sensitivity against a panel of bNAbs.**

786 The strength of the responses is color coded from dark to light where darker reds indicate stronger  
787 responses. Aquamarine indicates absence of response. T/F viruses from the same infant are labeled  
788 using the same color (left columns). The potency (geometric mean of responses) and breadth (%  
789 neutralized) of the infant viruses to each bNAb were compared with the geometric means of the  
790 bNAb's potency and breadth obtained from published studies using the LANL repository  
791 CATNAP (columns on the right). The most potent neutralization against infant viruses was  
792 mediated by V3 glycan bNAbs and CD4 binding site specific NIH45-46.

793 **Fig. 4 Neutralization sensitivity of maternal and infant viruses to paired maternal plasma at**  
794 **delivery.** Sensitivity of maternal non-transmitted variants (black dots), infant T/F variants (blue  
795 and green triangles) and the closest maternal variant (blue and green dots) to the infant T/F variant  
796 against autologous maternal sera. Sequences were selected following an algorithm to represent  
797 different motifs that diverge from the infant T/F (see Methods). Black horizontal lines represent  
798 the median of the ID<sub>50</sub> of maternal and infant sequences. The dashed line represents the detection  
799 threshold.

800

801 **Fig. 5 Neutralization sensitivity of maternal and infant viruses to paired maternal plasma**  
802 **and an MPER specific bNAb with and without identified signature sequences within MPER.**  
803 IC<sub>50</sub> of maternal non-transmitted variants (black dots), infant T/F variants (blue and green  
804 triangles) and the closest maternal variant (blue and green dots) to the 4 antibodies PG9, VRC01,  
805 DH429, and DH512. Black horizontal lines represent the median of the IC<sub>50</sub> of maternal and infant  
806 sequences. Dashed lines represent the detection threshold.

807

808 **Fig. 6 Comparison of neutralization sensitivity of maternal and infant viruses to epitope**  
809 **specific bNAbs.** Comparison of paired maternal plasma and MPER specific bNAb DH512  
810 maternal non-transmitted sequences (black dots) and infant T/F sequences (green triangles)  
811 between sequences that carry the wildtype amino acid at HXB2 positions 662, 676, 676, and 683,  
812 compared with those that carry a mutant. These four positions were chosen because they yielded  
813 a significant association with either maternal plasma responses (i.e. sequences carrying the  
814 mutant were statistically significantly more resistant to maternal plasma) or with DH512  
815 responses (i.e. sequences carrying the mutant were statistically significantly more resistant to DH

816 512) in the MPER epitope. P-values were obtained using a 1-sided permutation test (see  
817 Methods). Gray boxes represent median and quartiles of the responses.

818

819 **Fig. 7 Frequency plot of the V3 region sequences of mother and Infant T/F viruses.**

820 Weblogo plot showing frequency of amino acids in the V3 region was made using the  
821 AnalyzAlign tool from the LANL website. Positions were numbered based on HXB2 amino acid  
822 sequence. Amino acid positions identified in the signature sequence analysis are marked at the  
823 top of the plot.

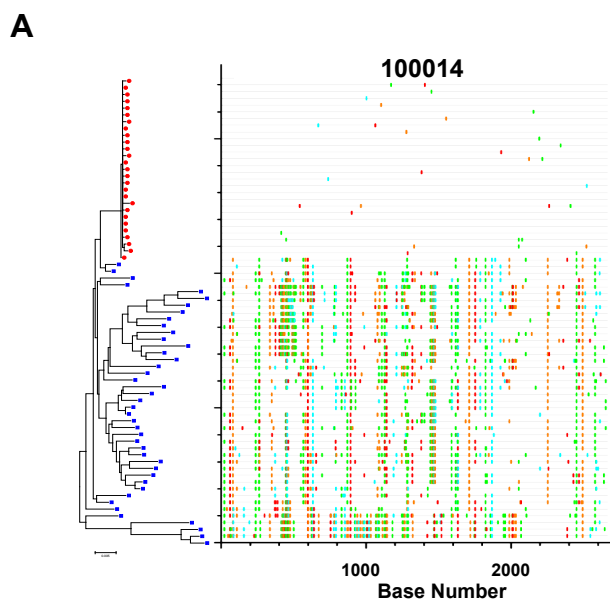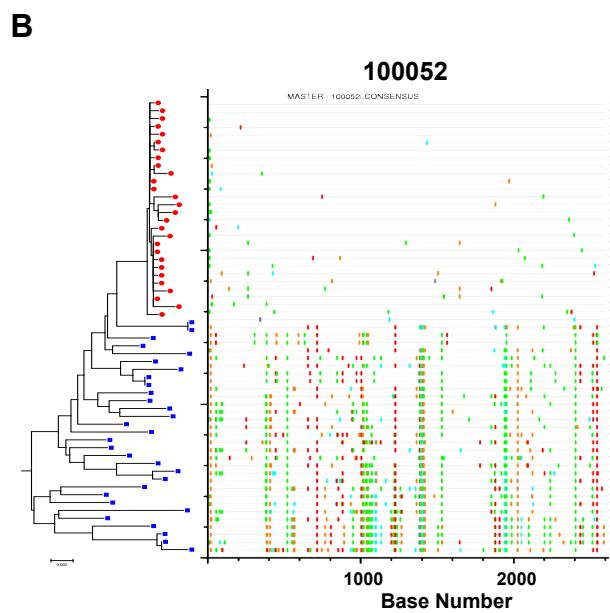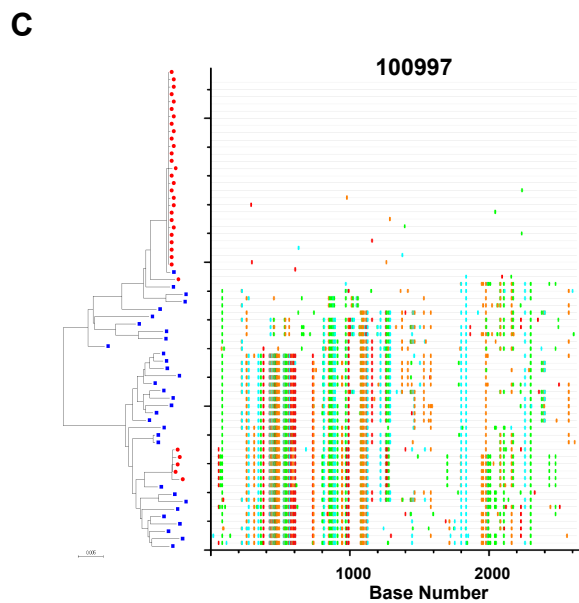

**Fig. 1**

| <b>Infant T/F</b> | <b>Virus Tier</b> | <b>Maternal plasma</b> | <b>Maternal plasma vs MLV</b> | <b>Infant plasma</b> | <b>Infant plasma vs MLV</b> |                  |
|-------------------|-------------------|------------------------|-------------------------------|----------------------|-----------------------------|------------------|
| 100002i.2.1       | 2                 | <20                    | <20                           | 84                   | 110                         |                  |
| 100014i.2.20      | 2                 | 89                     | 79                            | 97                   | 106                         |                  |
| 100046i.3.2       | 2                 | 98                     | <20                           | 411                  | 134                         |                  |
| 100052i.2.15      | 1B                | 37                     | <20                           | 200                  | 175                         |                  |
| 100307i.2.26      | 1B                | <20                    | <20                           | <40                  | <20                         |                  |
| 100307i.2.7*      | 2                 | 28                     | <20                           | <20                  | <20                         |                  |
| 100383i.3.5       | 2                 | <20                    | <20                           | 310                  | 156                         |                  |
| 100711i.3.26      | 2                 | <20                    | <20                           | <40                  | <20                         |                  |
| 100890i.2.1       | 2                 | <20                    | <20                           | <40                  | <20                         |                  |
| 100890i.2.4*      | 1A                | <20                    | <20                           | <20                  | <20                         |                  |
| 100997i.2.2       | 2                 | <20                    | <20                           | <20                  | <20                         |                  |
| 100997i.2.18*     | 3                 | <20                    | <20                           | <20                  | <20                         |                  |
| 101421i.2.23      | 1B                | <20                    | <20                           | <40                  | <20                         |                  |
| 101421i.2.11*     | 2                 | 30                     | <20                           | <20                  | <20                         |                  |
| 102149 i.2.23     | 2                 | 29                     | <20                           | 113                  | 88                          |                  |
| 102407 i.2.1      | 2                 | 22                     | <20                           | 109                  | 46                          | ID <sub>50</sub> |
| 102605i.33        | 2                 | 25                     | <20                           | 26                   | <20                         | <60              |
| 100155i.21        | 1B                | 21                     | <20                           | 550                  | 122                         | 60-100           |
| 100504i.20        | 2                 | 126                    | 60                            | 306                  | 134                         | 101-200          |
| 101984i.10        | 3                 | 26                     | <20                           | <20                  | <20                         | 201-300          |
| 101984i.21*       | 3                 | <20                    | <20                           | <20                  | <20                         | >300             |

**Fig. 2**

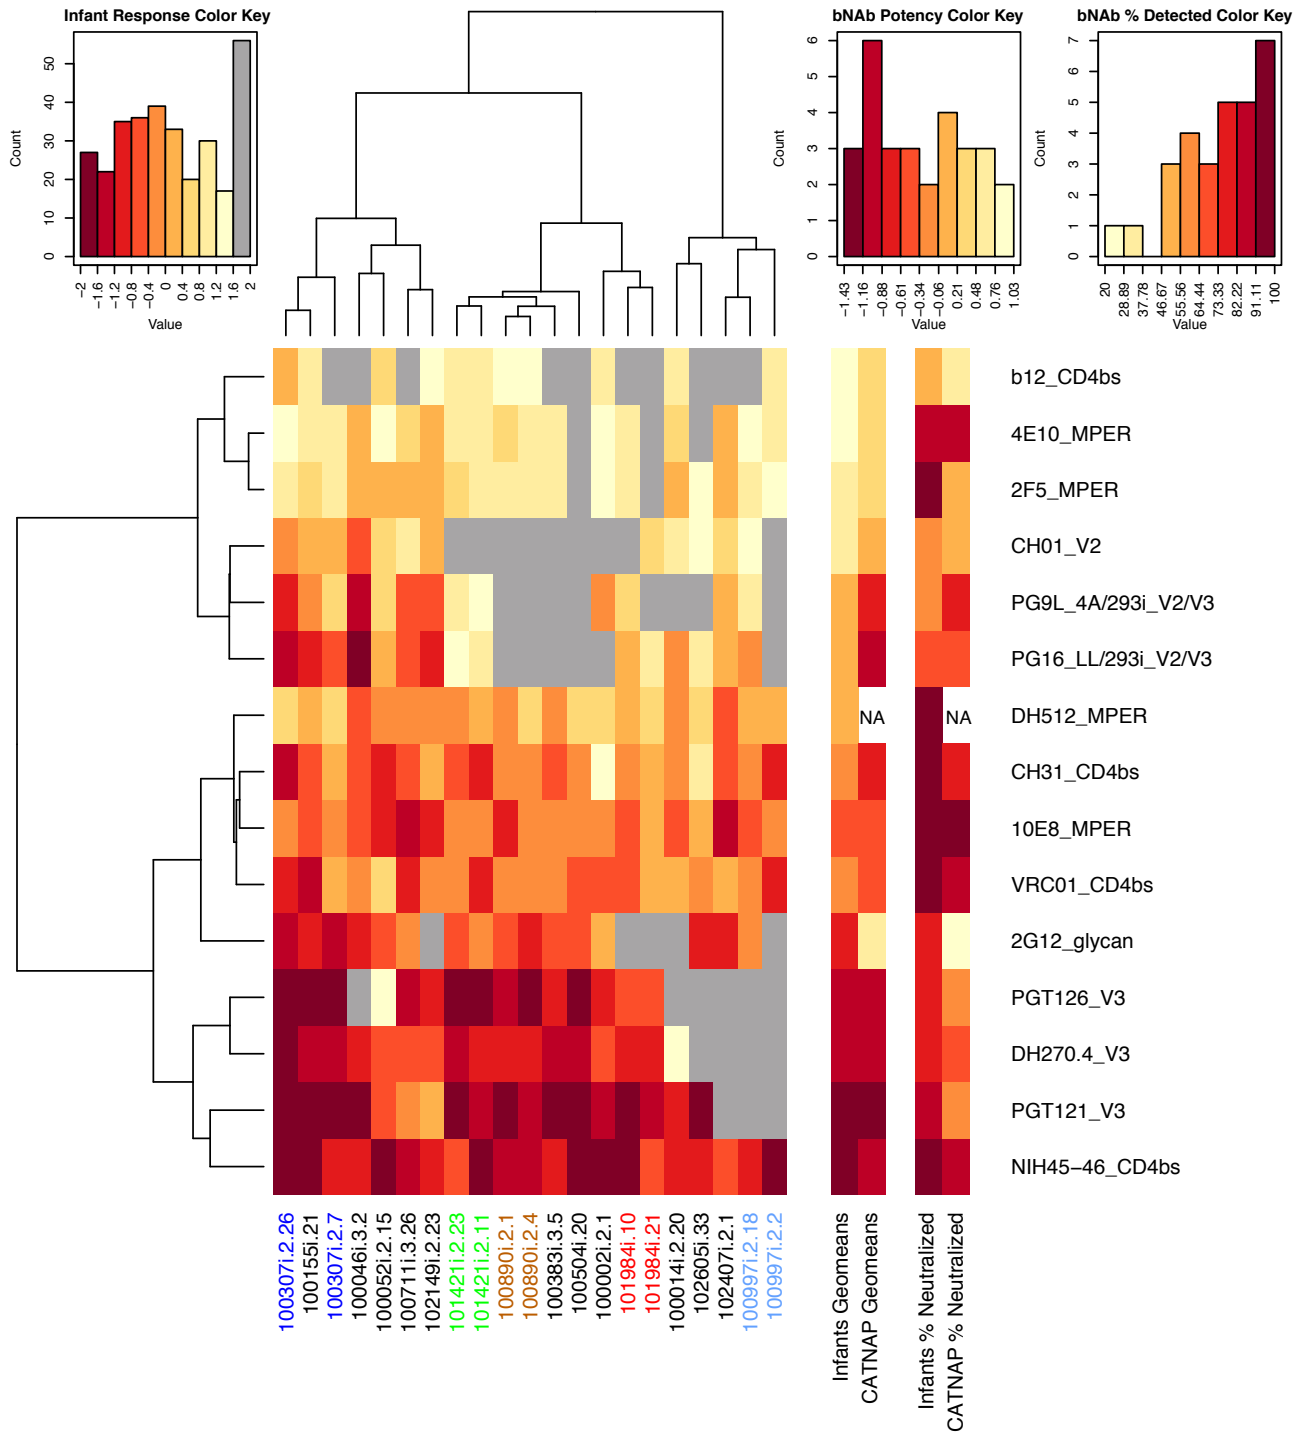

**Fig. 3**

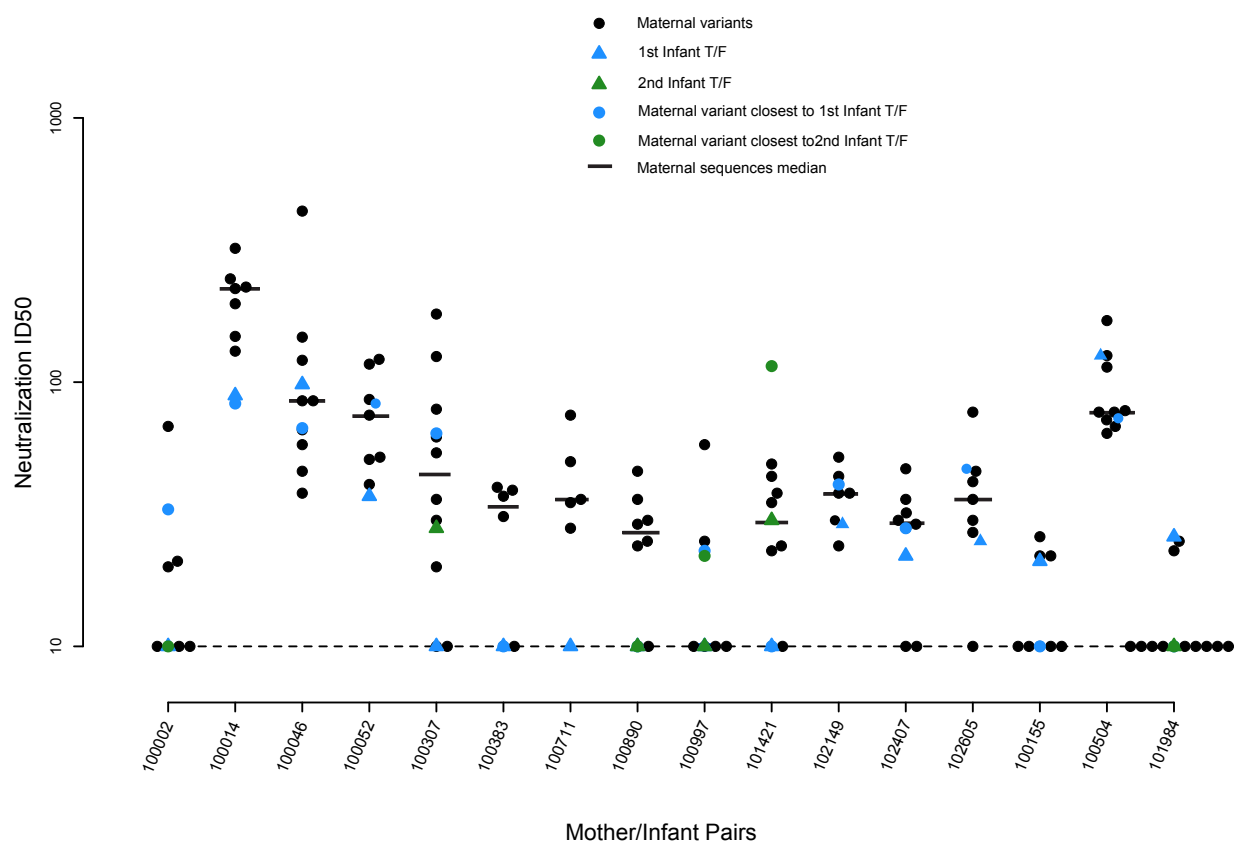

Fig. 4

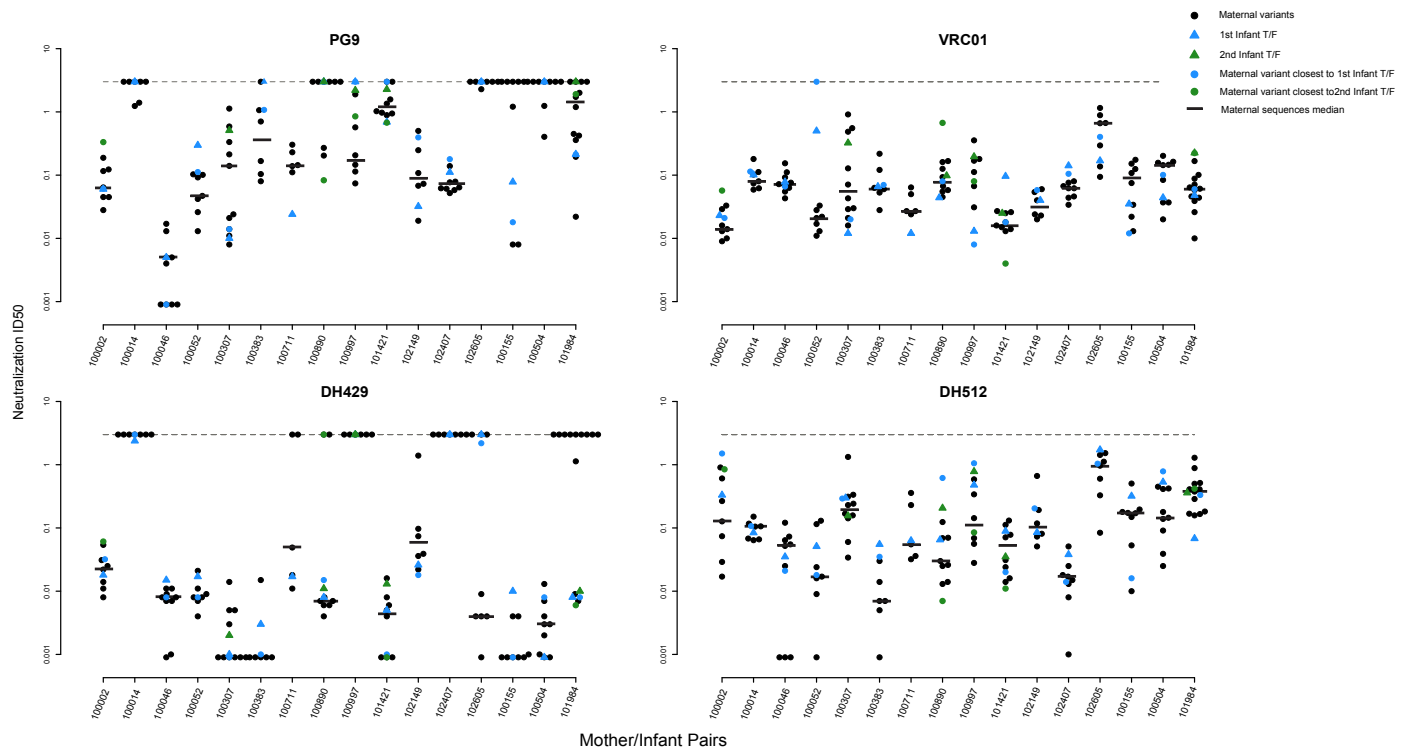

Fig. 5



## MATERNAL PLASMA

## DH512

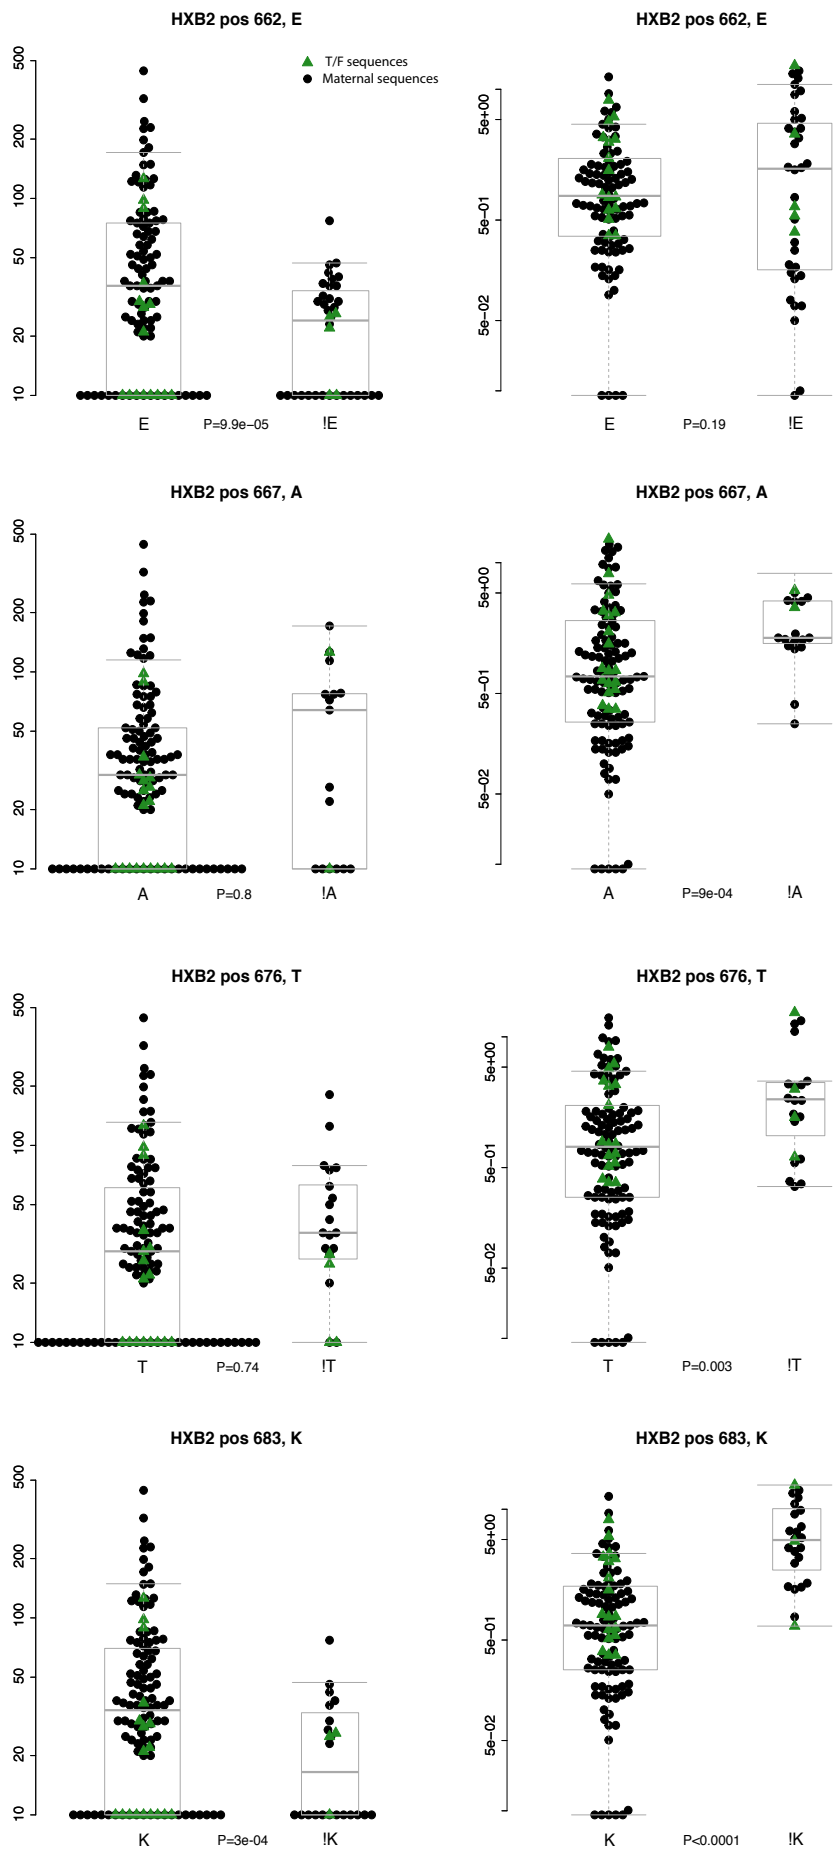

Fig. 6

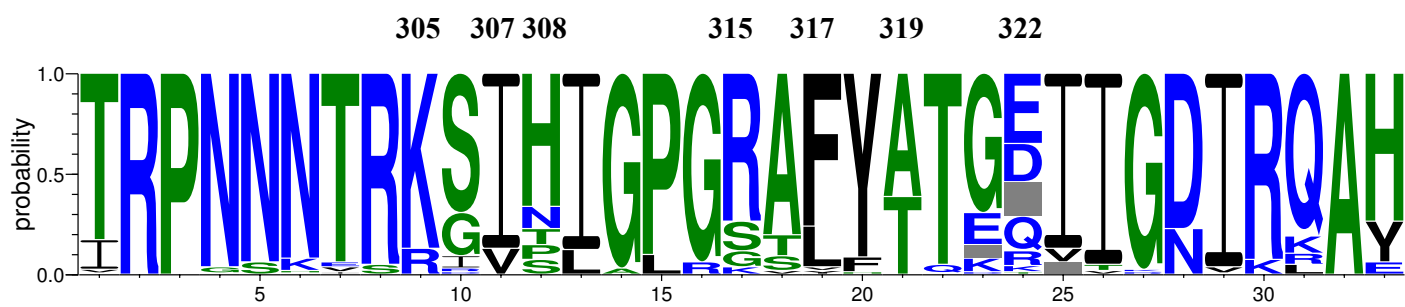

**Fig 7**
